# Supplementary material for: Double drives and private alleles for localised population genetic control
Source: PLOS journal article supplement (doi:10.1371/journal.pgen.1009333), 2021-03-23
Supplement: S3 (10.1371/journal.pgen.1009333.s003) [file journal.pgen.1009333.s003]

|           |                                                                            | A-suppression*   |                    | A-replacement or B <sup>†</sup> |                  |                    |
|-----------|----------------------------------------------------------------------------|------------------|--------------------|---------------------------------|------------------|--------------------|
| Parameter | Description                                                                | Haplo-sufficient | Haplo-insufficient | Neutral                         | Haplo-sufficient | Haplo-insufficient |
| $s_I$     | Fitness cost for target site disruption by insertion of construct          | 1                | 1                  | 0                               | 0                | 0                  |
| $h_I$     | Dominance coefficient for target site disruption by insertion of construct | 0                | 1                  | 0                               | 0                | 0                  |
| $s_R$     | Fitness cost for target site disruption by resistant allele                | 1                | 1                  | 0                               | 1                | 1                  |
| $h_R$     | Dominance coefficient for target site disruption by resistant allele       | 0                | 1                  | 0                               | 0                | 1                  |
| $s_{IR}$  | Fitness cost for heterozygotes (construct/resistant)                       | 1                | 1                  | 0                               | 0                | 1                  |

$s_I$ ,  $s_R$  and  $s_{IR}$  are selection coefficients associated with host gene disruption and  $h_I$  and  $h_R$  are dominance coefficients. At locus A in suppression double drives, fitness costs for disruption of function at the target site can occur either by insertion of the construct (I) or by end-joining that produces non-functional cleavage resistance (R), resulting in recessive or dominant female-specific lethality for haplo-sufficient or -insufficient genes respectively. At locus A in replacement double drives, or at the differentiated locus B in either suppression or replacement drives, fitness costs for disruption of the target site by construct insertion are assumed to be zero (e.g., by having the construct contain a recoded version of the target gene). Where the target site is a haplo-sufficient or -insufficient essential gene, non-functional cleavage-resistant mutants are expected to cause recessive or dominant lethality respectively, affecting in both males and females.

\* Fitness costs are female-specific.

<sup>†</sup> Fitness costs apply to both males and females.
